# Supplementary material
Source: PubMed Central journal article supplement (PMC6246601)
Supplement: 41396_2018_244_MOESM7_ESM.pdf [file 41396_2018_244_MOESM7_ESM.pdf]

**Table S3. Sensitivity of various *Bacteroides* strains to the indicated MACPF toxins of *B. fragilis* and *B. vulgatus/dorei***

| overlay strain                        | Growth inhibited by MACPF toxin             |                                                         | LPS glycan genetic type |
|---------------------------------------|---------------------------------------------|---------------------------------------------------------|-------------------------|
|                                       | <i>B. fragilis</i> J38-1<br>M068_0191 MACPF | <i>B. vulgatus</i> CL09T03C04<br>HMPREF1058_01765 MACPF |                         |
| <i>B. fragilis</i> 9343               | +                                           | -                                                       | 9343                    |
| <i>B. fragilis</i> 638R               | +                                           | -                                                       | 9343                    |
| <i>B. fragilis</i> CL03T12C07         | +                                           | -                                                       | 9343                    |
| <i>B. fragilis</i> CL05T12C13         | +                                           | -                                                       | 9343                    |
| <i>B. fragilis</i> CL07T12C05         | +                                           | -                                                       | 9343                    |
| <i>B. fragilis</i> CM13               | +                                           | -                                                       | 9343                    |
| <i>B. fragilis</i> 1284               | +                                           | -                                                       | 9343                    |
| <i>B. fragilis</i> US326              | +                                           | -                                                       | 9343                    |
| <i>B. fragilis</i> 12905              | +                                           | -                                                       | 9343                    |
| <i>B. fragilis</i> 2_1_16             | +                                           | -                                                       | 9343                    |
| <i>B. fragilis</i> I1345              | +                                           | -                                                       | 9343                    |
| <i>B. fragilis</i> J38-1              | -                                           | -                                                       | J38-1                   |
| <i>B. fragilis</i> 078320-1           | -                                           | -                                                       | J38-1                   |
| <i>B. vulgatus</i> CL10T00C06         | -                                           | +                                                       | CL10T00C06              |
| <i>B. vulgatus</i> ATCC 8482          | -                                           | +                                                       | CL10T00C06              |
| <i>B. vulgatus</i> CL04T12C01         | -                                           | +                                                       | CL10T00C06              |
| <i>B. vulgatus</i> CL05T12C02         | -                                           | +                                                       | CL10T00C06              |
| <i>B. dorei</i> CL02T12C06            | -                                           | +                                                       | CL10T00C06              |
| <i>B. dorei</i> 5_1_36/D4             | -                                           | +                                                       | CL10T00C06              |
| <i>B. vulgatus</i> CL09T03C04         | -                                           | -                                                       | CL09T03C04              |
| <i>B. dorei</i> CL03T12C01            | -                                           | -                                                       | CL09T03C04              |
| <i>B. thetaiotaomicron</i> VPI 5482   | -                                           | -                                                       |                         |
| <i>B. thetaiotaomicron</i> 1_1_6      | -                                           | -                                                       |                         |
| <i>B. thetaiotaomicron</i> CL01T00C32 | -                                           | -                                                       |                         |
| <i>B. thetaiotaomicron</i> CL12T03C10 | -                                           | -                                                       |                         |
| <i>B. thetaiotaomicron</i> CL15T12C11 | -                                           | -                                                       |                         |
| <i>B. uniformis</i> D20               | -                                           | -                                                       |                         |
| <i>B. uniformis</i> CL03T00C23        | -                                           | -                                                       |                         |
| <i>B. uniformis</i> CL07T00C16        | -                                           | -                                                       |                         |
| <i>B. uniformis</i> CL14T09C07        | -                                           | -                                                       |                         |
| <i>B. uniformis</i> ATCC 8492         | -                                           | -                                                       |                         |
| <i>B. ovatus</i> ATCC 8483            | -                                           | -                                                       |                         |
| <i>B. ovatus</i> CL02T12C04           | -                                           | -                                                       |                         |
| <i>B. ovatus</i> CL03T12C18           | -                                           | -                                                       |                         |
| <i>B. salyersiae</i> DSM 18765        | -                                           | -                                                       |                         |
| <i>B. salyersiae</i> CL02T12C01       | -                                           | -                                                       |                         |
| <i>B. nordii</i> CL02T12C05           | -                                           | -                                                       |                         |
| <i>B. cellulosilyticus</i> CL09T12C19 | -                                           | -                                                       |                         |

Blue shaded box and + indicates the strain is inhibited by the indicated MACPF toxin, - indicated no growth inhibition. All strains were tested for sensitivity to the MACPF proteins produced from heterologous strains constitutively synthesizing these toxins compared to the strain with the empty vector.

LPS glycan genetic type indicates same genetic architecture with the specified *B. fragilis* or *B. vulgatus/dorei* strains of Fig 1.
